# Supplementary material for: Efficacy and Safety of Acupoint Catgut Embedding for Diarrhea‐Predominant Irritable Bowel Syndrome and Constipation‐Predominant Irritable Bowel Syndrome: A Systematic Review and Meta‐Analysis
Source: Hindawi journal article supplement (doi:10.1155/2020/5812320), 2020-01-01
Supplement: f1 [file 5812320.f1.pdf]

|                                                                                                                                                                                                        |    |
|--------------------------------------------------------------------------------------------------------------------------------------------------------------------------------------------------------|----|
| table S1: Detailed characteristics of included trials (IBS-C).....                                                                                                                                     | 5  |
| table S2: Detailed characteristics of included trials (IBS-D).....                                                                                                                                     | 9  |
| figure S1: The flow diagram of the study selection process.....                                                                                                                                        | 10 |
| figure S2: Acupoint catgut embedding (ACE) alone versus oral Western medicine (OWM) alone-1 for constipation -predominant irritable bowel syndrome (IBS-C).....                                        | 11 |
| figure S3: Acupoint catgut embedding (ACE) alone versus oral Western medicine (OWM) alone-2 for constipation -predominant irritable bowel syndrome (IBS-C).....                                        | 12 |
| figure S4: Acupoint catgut embedding (ACE) alone versus oral Western medicine (OWM) alone-1 for diarrhea-predominant irritable bowel syndrome (IBS-D).....                                             | 13 |
| figure S5: Acupoint catgut embedding (ACE) alone versus oral Western medicine (OWM) alone-2 for diarrhea-predominant irritable bowel syndrome (IBS-D).....                                             | 14 |
| figure S6: Acupoint catgut embedding (ACE) plus other acupoint-based therapy (ABT) versus oral Western medicine (OWM) alone for constipation -predominant irritable bowel syndrome (IBS-C) .....       | 15 |
| figure S7: Acupoint catgut embedding (ACE) plus other acupoint-based therapy (ABT) versus oral Western medicine (OWM) alone for diarrhea-predominant irritable bowel syndrome (IBS-D).....             | 16 |
| figure S8: Acupoint catgut embedding (ACE) plus oral traditional Chinese medicine (OTCM) versus oral Western medicine (OWM) alone for constipation -predominant irritable bowel syndrome (IBS-C) ..... | 17 |

figure S9: Acupoint catgut embedding (ACE) plus oral traditional Chinese medicine (OTCM) versus oral Western medicine (OWM) alone for diarrhea-predominant irritable bowel syndrome (IBS-D)..... 18

figure S10: Acupoint catgut embedding (ACE) plus oral traditional Chinese medicine (OTCM) versus OTCM alone for diarrhea-predominant irritable bowel syndrome (IBS-D) ..... 19

figure S11: Acupoint catgut embedding (ACE) plus other acupoint-based therapy (ABT) versus other ABT alone for diarrhea-predominant irritable bowel syndrome (IBS-D)..... 20

figure S12: Acupoint catgut embedding (ACE) plus oral Western medicine (OWM) versus OWM alone for diarrhea-predominant irritable bowel syndrome (IBS-D)..... 21

| Study      | Age (E/C)                              | Duration (E/C)                       | Male (E/C) | Female (E/C) | Interventions (E/C)                                                        | Period of treatment (E/C) | Outcomes                                                                                                                                                                                                                                                                                                                                                                                                                                                                                                                                                                                                   | Adverse events (E/C) |
|------------|----------------------------------------|--------------------------------------|------------|--------------|----------------------------------------------------------------------------|---------------------------|------------------------------------------------------------------------------------------------------------------------------------------------------------------------------------------------------------------------------------------------------------------------------------------------------------------------------------------------------------------------------------------------------------------------------------------------------------------------------------------------------------------------------------------------------------------------------------------------------------|----------------------|
| Liang 2010 | 20-70(mean=53.6)/22-68(mean=51.3)Y     | 0.5-8/0.5-8Y                         | 10/8       | 20/17        | ACE (qw) + Tai chi chuan/ Mosapride tablets (tid)                          | 2M                        | 1. Recovery rate; 2. Accumulative effective rate.                                                                                                                                                                                                                                                                                                                                                                                                                                                                                                                                                          | NR                   |
| Liu 2019   | A*                                     | B*                                   | 9/14       | 38/33        | ACE (1 per 2W)/Calcium polycarbophil tablets (tid)                         | 1M                        | 1. Recovery rate; 2. Accumulative marked effective rate; 3. Accumulative effective rate; 4. Total symptom score; 5. Main symptom score; 6. Defecation frequency score; 7. Defecation difficulty score; 8. Fecal shape score; 9. Defecation time score; 10. Abdominal pain score; 11. Abdominal distention score; 12. Thirst score; 13. Palpitation and fatigue score; 14. Insomnia and dreaminess score; 15. Chest fullness score; 16. Belching and sighing score; 17. Sweating and shortness of breath score; 18. Inappetence score; 19. Fidgety and anxious score; 20. Total efficiency after one month. | N/N                  |
| Gao 2016   | 20-62(33.00±12.20)/22-65(35.00±11.79)Y | 6-120(mean=50.23)/22-68(mean=54.77)M | 14/12      | 19/21        | ACE (qw) + auricular point sticking (tid)/ Mosapride ctrate capsules (tid) | 4W                        | 1. Recovery rate; 2. Accumulative effective rate; 3. Cleveland clinic score (total).                                                                                                                                                                                                                                                                                                                                                                                                                                                                                                                       | N/N                  |
| Chai 2019  | (34.23±10.17)/(33.71±9.74)Y            | 1-10(2.90±0.67)/1-12(3.12±0.59)Y     | 12/14      | 23/21        | ACE (1 per 15D) + Lactulose oral                                           | 60D                       | 1. Recovery rate; 2. Accumulative marked effective rate; 3. Accumulative effective rate; 4. Clinical symptom score; 5. Irritable Bowel Syndrome Quality of Life (IBS-QOL) questionnaire score.                                                                                                                                                                                                                                                                                                                                                                                                             | NR                   |

|                  |                                          |                                                 |           |       |                                                                                                      |    |                                                                                                                                                                                                                                                                                               |     |
|------------------|------------------------------------------|-------------------------------------------------|-----------|-------|------------------------------------------------------------------------------------------------------|----|-----------------------------------------------------------------------------------------------------------------------------------------------------------------------------------------------------------------------------------------------------------------------------------------------|-----|
|                  |                                          |                                                 |           |       | liquid (tid)/<br>Lactulose oral<br>liquid (tid)                                                      |    |                                                                                                                                                                                                                                                                                               |     |
| Xu<br>2018       | 18-74(51.21±1.58)/18-<br>72(49.28±2.29)Y | (6M-11)/(6M-<br>10)Y                            | 12/1<br>0 | 19/21 | ACE (qw) +<br>auricular point<br>sticking /<br>Mosapride<br>ctrate capsules<br>(tid)                 | 2W | 1. Recovery rate; 2. Accumulative effective rate; 3. Constipation related<br>symptom score.                                                                                                                                                                                                   | NR  |
| Zou<br>2010      | 19-58(42±3)Y                             | 8(M)-4Y                                         | 28        | 32    | ACE (qw) +<br>Shugan Daozhi<br>Decoction<br>(TCM,<br>tid)/Itopride<br>hydrochloride<br>tablets (tid) | 4W | 1. Abdominal pain score; 2. Abdominal distention score; 3. Stool<br>frequency score; 4. Stool character score; 5. Threshold of anorectum<br>motor and sensory ability; 6. Recurrence rate (1 month).                                                                                          | NR  |
| Hao<br>2013      | 16-58(mean=36.5)/21-<br>60(mean=40.1)Y   | 6(M)-<br>12(mean=3.8)/6(<br>M)-<br>9(mean=4.1)Y | 9/8       | 16/17 | ACE (q.15.d) +<br>Zhizhu<br>granules (TCM,<br>bid)/<br>Mosapride<br>tablets (tid)                    | 1M | 1. Recovery rate; 2. Accumulative marked effective rate; 3. Accumulative<br>effective rate.                                                                                                                                                                                                   | N/N |
| Don<br>g<br>2011 | C*                                       | NR                                              | 11/1<br>0 | 19/20 | ACE (qw) +<br>diet therapy<br>/sham ACE<br>(qw) + diet                                               | 6W | 1. Somatization symptom score; 2. Obsession symptom score; 3.<br>Interpersonal sensitivity score; 4. Depression score; 5. Anxiety score; 6.<br>Hostility symptom score; 7. Terror symptom score; 8. Paranoia score; 9.<br>Psychosis symptom score; 10. Score of other condition; 11. Clinical | N/N |

|                                                                                                                                                                                                                                                                                                                                                                                                                                                                                                                                                                                                                                  |                                    |                                     |       |       | therapy                                                                      |       | constipation symptom score.                                                                                                                                                                                                                                             |    |
|----------------------------------------------------------------------------------------------------------------------------------------------------------------------------------------------------------------------------------------------------------------------------------------------------------------------------------------------------------------------------------------------------------------------------------------------------------------------------------------------------------------------------------------------------------------------------------------------------------------------------------|------------------------------------|-------------------------------------|-------|-------|------------------------------------------------------------------------------|-------|-------------------------------------------------------------------------------------------------------------------------------------------------------------------------------------------------------------------------------------------------------------------------|----|
| Jin<br>2014                                                                                                                                                                                                                                                                                                                                                                                                                                                                                                                                                                                                                      | 18-65(mean=40.3)/20-63(mean=39.6)Y | 6(M)-10(mean=3.2)/1-8(mean=3.4)Y    | 14/15 | 18/17 | ACE (1 per 2W)/Domperidone tablets (tid)                                     | 4W    | 1. Recovery rate; 2. Accumulative marked effective rate; 3. Accumulative effective rate; 4. Abdominal distention score; 5. Abdominal pain score; 6. Defecation frequency score; 7. Defecation difficulty score; 8. Incomplete defecation score; 9. Total symptom score. | NR |
| Liang<br>2010                                                                                                                                                                                                                                                                                                                                                                                                                                                                                                                                                                                                                    | 20-75(mean=52)/22-70(mean=54)Y     | (0.5-7)Y                            | 15/10 | 23/20 | ACE (qw) + finger-pressing (qd)/ Mosapride citrate dispersible tablets (tid) | 4W/5W | 1. Recovery rate; 2. Accumulative marked effective rate; 3. Accumulative effective rate.                                                                                                                                                                                | NR |
| Hao<br>2015                                                                                                                                                                                                                                                                                                                                                                                                                                                                                                                                                                                                                      | 16-58(mean=34.5)/21-60(mean=40.1)Y | 3(M)-12(mean=3.2)/6(M)-9(mean=4.1)Y | 9/8   | 16/17 | ACE (NR) + Zhizhu Decoction (TCM, bid)/ Mosapride capsule (tid)              | *(1M) | 1. Anorectal resting pressure; 2. Anorectal pressure during defecation simulation; 3. Rectal response to volume expansion stimulation.                                                                                                                                  | NR |
| <p>Y: Yeay; M: Month; W: Week; D: Day; NR: Not reported; N: None; ACE: Acupoint catgut embedding; A*: 14 cases (18-40Y), 16 cases (41-60Y), 17 cases (61-85Y) in the experimental group, and 11 cases (18-40Y), 21 cases (41-60Y), 15 cases (61-85Y) in the control group; B*: 15 cases (12-18M), 16 cases (19-36M), 16 cases (&gt;36M) in the experimental group, and 11 cases (12-18M), 21 cases (19-36M), 15 cases (&gt;36M) in the control group; C*: 12 cases (18-35Y), 10 cases (36-55Y), 8 cases (56-65Y) in the experimental group, and 10 cases (18-35Y), 11 cases (36-55Y), 9 cases (56-65Y) in the control group.</p> |                                    |                                     |       |       |                                                                              |       |                                                                                                                                                                                                                                                                         |    |

*table S1: Detailed characteristics of included trials (IBS-C)*

| Study      | Age (E/C)                            | Duration (E/C)                      | Male (E/C) | Female (E/C) | Interventions (E/C)                                                                         | Period of treatment (E/C) | Outcomes                                                                                                                                                                                     | Adverse events (E/C) |
|------------|--------------------------------------|-------------------------------------|------------|--------------|---------------------------------------------------------------------------------------------|---------------------------|----------------------------------------------------------------------------------------------------------------------------------------------------------------------------------------------|----------------------|
| Chai 2018  | 25-65Y                               | 1-22Y                               | 58         | 70           | ACE (qw)+ Fire needle therapy (1 per 3D)/Normal acupuncture (qd)                            | NR                        | 1. Recovery rate; 2. Accumulative marked effective rate; 3. Accumulative effective rate.                                                                                                     | NR                   |
| Deng 2017  | 21-63(42.56±1.7)Y                    | 4(M)-2(0.85±0.14)Y                  | 33         | 27           | ACE (qw)+ Compound Zhixie Powder (TCM, bid)/ Trimebutine Maleate (tid)                      | 8W                        | 1. Recovery rate; 2. Accumulative marked effective rate; 3. Accumulative effective rate; 4. Total symptom score.                                                                             | NR                   |
| Guo 2011   | 22-58(mean=38.5)/24-61(mean=39.6)Y   | 1-10(mean=7.5)/1.5-11(mean=7.9)Y    | 18/16      | 22/24        | ACE (1 per 15D)+ Tongxie Yaofang Decoction (TCM, bid)/ Tongxie Yaofang Decoction TCM, (bid) | 1M                        | 1. Recovery rate; 2. Accumulative effective rate; 3. Recurrence rate (6 month).                                                                                                              | NR                   |
| Hong 2011  | 19-65(42.7±9.5)/18-69(45.5±9)Y       | 0.9-15(5.2±0.85)/1.2-10.6(6.3±1.1)Y | 16/13      | 14/17        | ACE (1 pre 10D)/ Pividromide tablets (tid)                                                  | 30D                       | 1. Recovery rate; 2. Accumulative marked effective rate; 3. Accumulative effective rate; 4. Recurrence rate (3 month).                                                                       | NR                   |
| Huang 2008 | 20-60(30.21±5.23)/20-62(32.21±4.26)Y | 2-48(9.23±2.96)/4-50(8.32±2.51)M    | 10/12      | 30/28        | ACE (1 pre 10D)/ Otibromide tablets (tid)                                                   | 30D                       | 1. Recovery rate; 2. Accumulative marked effective rate; 3. Accumulative effective rate; 4. Abdominal pain score; 5. Diarrhea score; 6. Defecation frequency score; 7. Mucinous stool score. | NR                   |

|             |                                    |                                     |       |       |                                                                                                                   |      |                                                                                                                                                                                                                                                                                                                                                                                                                                  |     |
|-------------|------------------------------------|-------------------------------------|-------|-------|-------------------------------------------------------------------------------------------------------------------|------|----------------------------------------------------------------------------------------------------------------------------------------------------------------------------------------------------------------------------------------------------------------------------------------------------------------------------------------------------------------------------------------------------------------------------------|-----|
| Liu<br>2013 | (37±8.12)/(35±8.66)Y               | A*                                  | 13/12 | 17/17 | ACE (qw)/ Tongxie<br>Yaofang Decoction<br>(TCM, qd)                                                               | 6W   | 1. Recovery rate; 2. Accumulative marked effective rate; 3. Accumulative effective rate; 4. Total symptom score; 5. Diarrhea score; 6. Abdominal pain and distention score; 7. Tinnitus score; 8. Glomus and fullness score; 9. Inappetence score; 10. Languid score; 11. Fatigue score; 12. Thirst score; 13. Belching score; 14. Scanty yellowish urine score; 15. Fear of cold score; 16. Limp aching lumbus and knees score. | Y/N |
| Lu<br>2015  | 20-62(32.21±4.26)Y                 | 1(M)-2(0.81±0.12)Y                  | 31    | 49    | ACE (qw)+ Shenling<br>Baizhu Powdercombined<br>with Tongxie Yaofang<br>Decoction (TCM, bid)/<br>Trimebutine (tid) | 8W   | 1. Accumulative marked effective rate; 2. Accumulative effective rate (and the two rates of six months and one year after treatment).                                                                                                                                                                                                                                                                                            | NR  |
| Su<br>2008  | 18-70Y                             | 6(M)-20Y                            | 46    | 40    | ACE (1 per 15D)+<br>Anchang Decoction<br>(TCM, qd)/ Anchang<br>Decoction (TCM, qd)                                | 2-3M | 1. Accumulative marked effective rate; 2. Accumulative effective rate;                                                                                                                                                                                                                                                                                                                                                           | NR  |
| Su<br>2019  | 19-65(43.3±9.2)/18-<br>65(44±9.5)Y | 0.5-10(3.6±1.1)/0.4-<br>8(3.1±0.9)M | 17/15 | 23/25 | ACE (NR)+<br>Moxibustion at the<br>Governor vessel (qw)/<br>Pividromide tablets (tid)                             | 4W   | 1. Recovery rate; 2. Accumulative marked effective rate; 3. Accumulative effective rate; 4. Abdominal pain score; 5. Abdominal distention score; 6. Score of incomplete defecation; 7. Defecation frequency score; 8. Stool consistency score; 9. IBS-QOL score.                                                                                                                                                                 | N/N |
| Wang        | (37.93±11.45)/(39.1±11.8)Y         | (5.23±7.35)/(4.33±3.93)Y            | 25/25 | 35/35 | ACE (qw)+ acupoint                                                                                                | 4W   | 1. Accumulative marked effective rate; 2.                                                                                                                                                                                                                                                                                                                                                                                        | NR  |

|                |          |         |       |       |                                                                                                                                                |    |                                                                                                                                                                                                                                                                                                                       |     |
|----------------|----------|---------|-------|-------|------------------------------------------------------------------------------------------------------------------------------------------------|----|-----------------------------------------------------------------------------------------------------------------------------------------------------------------------------------------------------------------------------------------------------------------------------------------------------------------------|-----|
| 2017           |          |         |       |       | application (qod)/<br>acupoint application<br>(qod)                                                                                            |    | Accumulative effective rate; 3. Abdominal<br>distention score; 4. Abdominal pain score; 5.<br>Diarrhea score.                                                                                                                                                                                                         |     |
| Yao<br>2012    | B*       | NR      | 17/20 | 13/10 | ACE (qw)+ Trimebutine<br>Maleate (tid)/<br>Trimebutine Maleate<br>(tid)                                                                        | 2W | 1. Recovery rate; 2. Accumulative marked<br>effective rate; 3. Accumulative effective rate; 4.<br>Total symptom score.                                                                                                                                                                                                | N/N |
| Ying<br>2009   | mean=45Y | 1(M)-6Y | 36    | 15    | ACE (NR)+ Aconite<br>cake-partitioned<br>moxibustion (NR)/<br>Montmorillonite powder<br>(tid)+ Oryzanol (tid)+<br>Trimebutine Maleate<br>(tid) | NR | 1. Accumulative marked effective rate; 2.<br>Accumulative effective rate;                                                                                                                                                                                                                                             | NR  |
| Zeng<br>2013 a | NR       | NR      | C*    |       | ACE (qw)+ Buzhong<br>Yiqi Decoction (bid)/<br>Buzhong Yiqi Decoction<br>(bid)                                                                  | 6W | 1. Recovery rate; 2. Accumulative marked<br>effective rate; 3. Accumulative effective rate; 4.<br>Abdominal pain score; 5. Abdominal distention<br>score; 6. Defecation frequency score; 7.<br>Mucinous stool score; 8. Recurrence rate (1<br>month); 9. Recurrence rate (3 month); 10.<br>Recurrence rate (6 month). | NR  |
| Zeng<br>2013 b |          |         | D*    |       | ACE (qw)+ Buzhong<br>Yiqi Decoction (bid)/<br>Montmorillonite powder<br>(tid)                                                                  |    |                                                                                                                                                                                                                                                                                                                       |     |
| Zeng<br>2013 c |          |         | E*    |       | ACE (qw)/ Buzhong<br>Yiqi Decoction (bid)                                                                                                      |    |                                                                                                                                                                                                                                                                                                                       |     |
| Zeng<br>2013 d |          |         | F*    |       | ACE (qw)/<br>Montmorillonite powder                                                                                                            |    |                                                                                                                                                                                                                                                                                                                       |     |



|                                                                                                                                                                                                                                                                                                                                                                                                                                                                                                                                                                                                                                                                                                                                                                                                                                                                                                                                                                              |                                           |                                         |       |       |                                                                                                                                                                                                                      |    |                                                                                                                                                                                                                                                                                       |     |
|------------------------------------------------------------------------------------------------------------------------------------------------------------------------------------------------------------------------------------------------------------------------------------------------------------------------------------------------------------------------------------------------------------------------------------------------------------------------------------------------------------------------------------------------------------------------------------------------------------------------------------------------------------------------------------------------------------------------------------------------------------------------------------------------------------------------------------------------------------------------------------------------------------------------------------------------------------------------------|-------------------------------------------|-----------------------------------------|-------|-------|----------------------------------------------------------------------------------------------------------------------------------------------------------------------------------------------------------------------|----|---------------------------------------------------------------------------------------------------------------------------------------------------------------------------------------------------------------------------------------------------------------------------------------|-----|
|                                                                                                                                                                                                                                                                                                                                                                                                                                                                                                                                                                                                                                                                                                                                                                                                                                                                                                                                                                              |                                           |                                         |       |       | (tid)                                                                                                                                                                                                                |    |                                                                                                                                                                                                                                                                                       |     |
| Zeng<br>2013 e                                                                                                                                                                                                                                                                                                                                                                                                                                                                                                                                                                                                                                                                                                                                                                                                                                                                                                                                                               |                                           |                                         | G*    |       | ACE (qw)/ ACE (qw)+<br>Buzhong Yiqi Decoction<br>(bid)                                                                                                                                                               |    |                                                                                                                                                                                                                                                                                       |     |
| Zhao<br>2014                                                                                                                                                                                                                                                                                                                                                                                                                                                                                                                                                                                                                                                                                                                                                                                                                                                                                                                                                                 | (41.43±11.24)/(40.77±11.13)<br>Y          | (14.43±5.67)/(14.8±6.49)<br>M           | 12/13 | 18/17 | ACE (1 per 3W)/<br>Peifeikang capsule (tid)+<br>Otibromide tablets (tid)                                                                                                                                             | 6W | 1. Accumulative marked effective rate; 2.<br>Accumulative effective rate; 3. Stool<br>classification; 4. Total symptom score.                                                                                                                                                         | N/N |
| Zhao<br>2019                                                                                                                                                                                                                                                                                                                                                                                                                                                                                                                                                                                                                                                                                                                                                                                                                                                                                                                                                                 | 22-60(41.98±10.72)/20-<br>55(39.42±9.38)Y | 1-9.5(3.82±1.84)/1.5-<br>10(3.79±1.84)Y | 13/15 | 39/38 | ACE (1 per 2W)+<br>Trimebutine Maleate<br>(tid)+ Bifidobacterium<br>triple viable enteric<br>coated capsule (tid)/<br>Trimebutine Maleate<br>(tid)+ Bifidobacterium<br>triple viable enteric<br>coated capsule (tid) | 8W | 1. Recovery rate; 2. Accumulative marked<br>effective rate; 3. Accumulative effective rate; 4.<br>Total symptom score; 5. Abdominal pain score;<br>6. Abdominal distention score; 7. Stool<br>consistency score; 8. Total score of symptom<br>severity; 9. Recurrence rate (3 month). | Y/N |
| <p>Y: Yeay; M: Month; W: Week; D: Day; NR: Not reported; N: None; ACE: Acupoint catgut embedding; A*: 4 cases (&lt;0.5 year), 14 cases (0.5-3 years), 12 cases (&gt;3 years) in the experimental group and 3 cases (&lt;0.5 year), 16 cases (0.5-3 years) 10 cases (&gt;3 years) in the control group; B*: 11 cases (18-29 years old), 9 cases (30-39 years old), 6 cases (40-49 years old), 4 cases (50-65 years old) in the experimental group and 11 cases (18-29 years old), 10 cases (30-39 years old), 5 cases (40-49 years old), 4 cases (50-65 years old) in the control group; C*: 20 cases in the experimental group and 20 cases in the control group; D*: 20 cases in the experimental group and 21 cases in the control group; E*: 20 cases in the experimental group and 20 cases in the control group; F*: 20 cases in the experimental group and 21 cases in the control group; G*:20 cases in the experimental group and 20 cases in the control group.</p> |                                           |                                         |       |       |                                                                                                                                                                                                                      |    |                                                                                                                                                                                                                                                                                       |     |

*table S2: Detailed characteristics of included trials (IBS-D)*

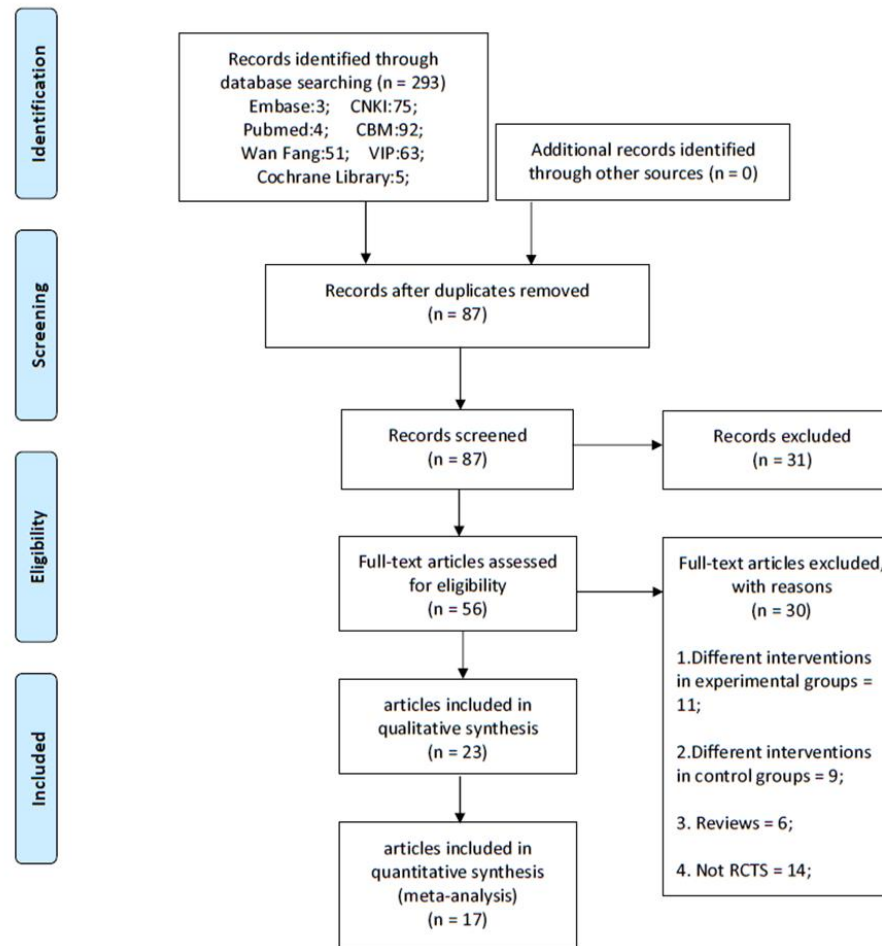

*figure S1: The flow diagram of the study selection process*

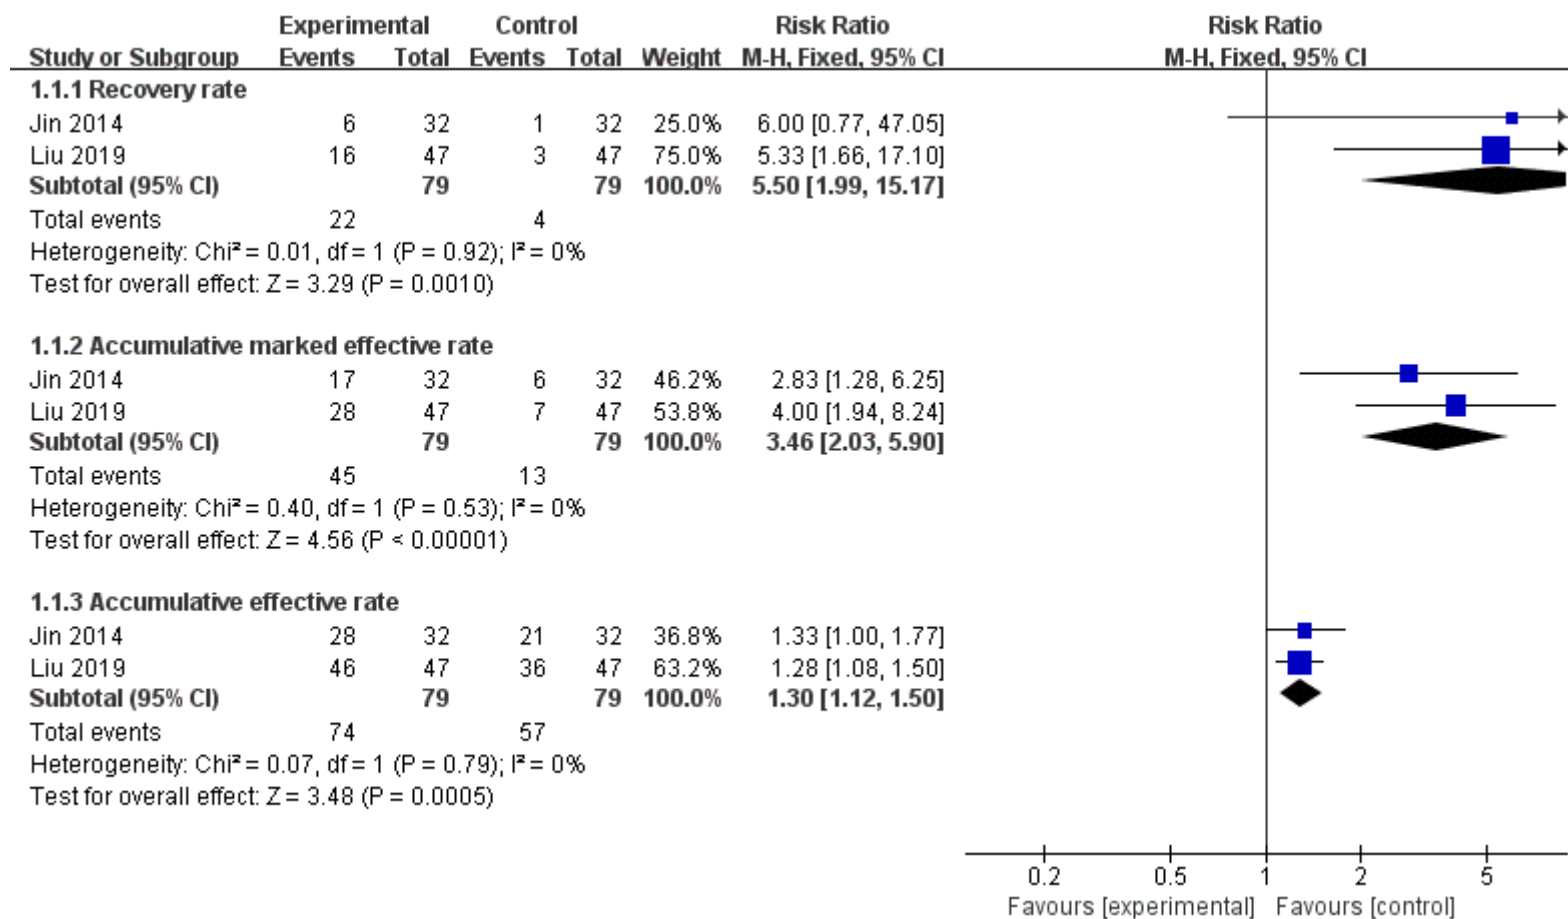

*figure S2: Acupoint catgut embedding (ACE) alone versus oral Western medicine (OWM) alone-1 for constipation -predominant irritable bowel syndrome (IBS-C)*

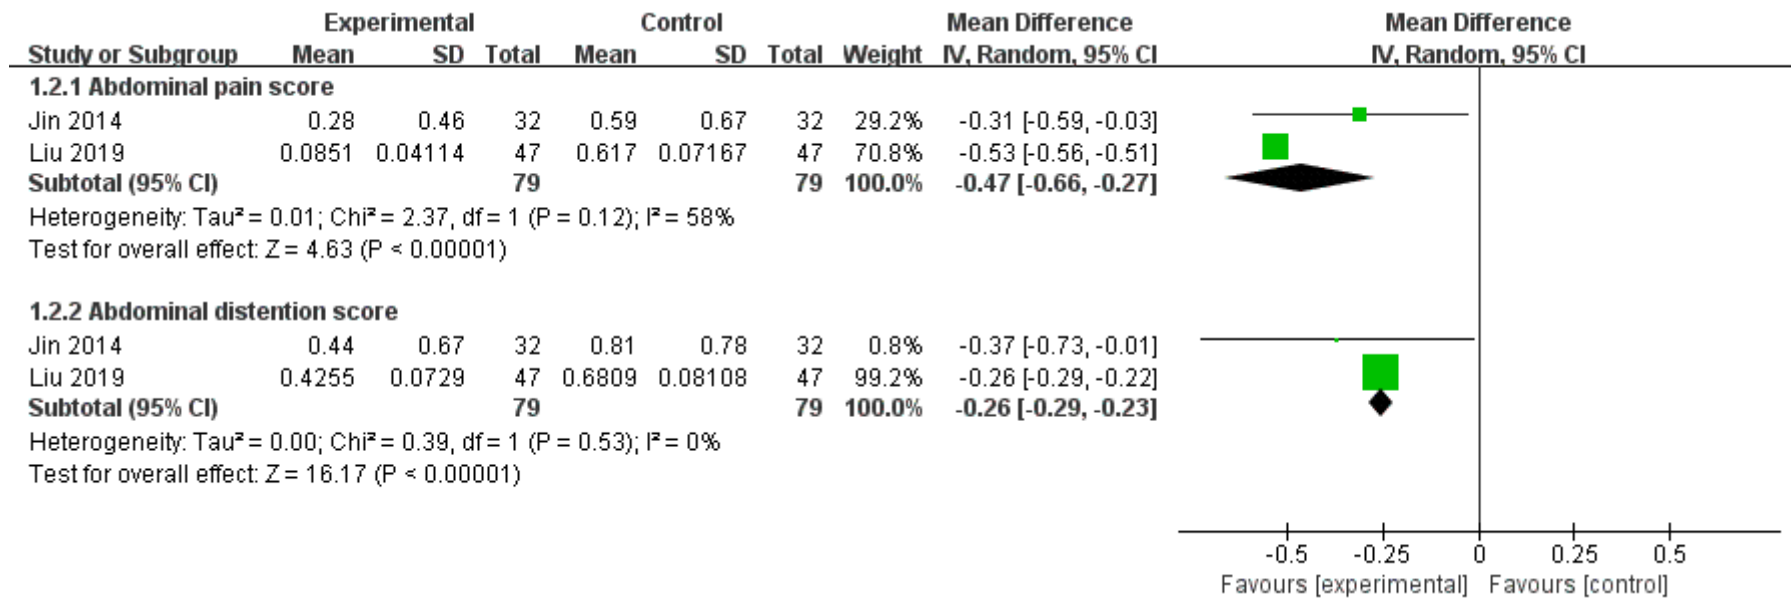

*figure S3: Acupoint catgut embedding (ACE) alone versus oral Western medicine (OWM) alone-2 for constipation -predominant irritable bowel syndrome (IBS-C)*

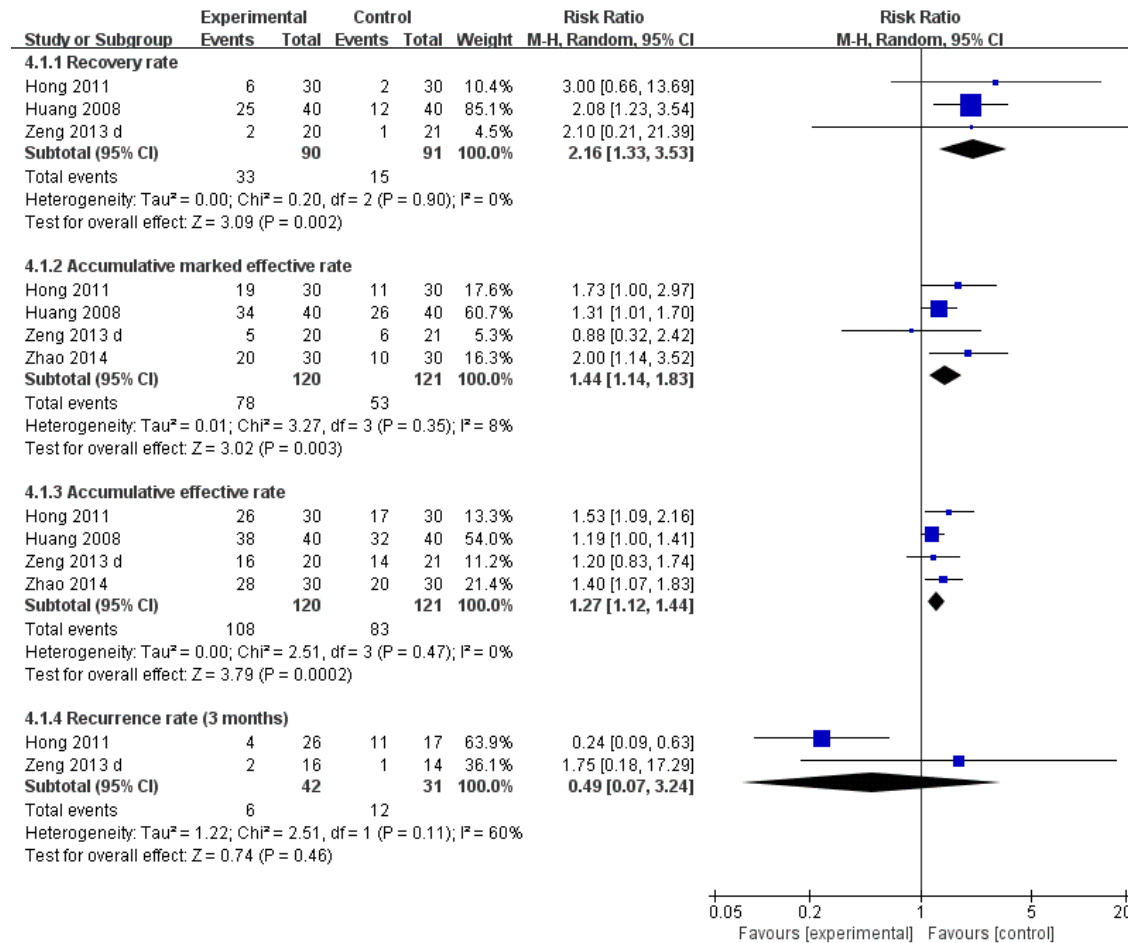

*figure S4: Acupoint catgut embedding (ACE) alone versus oral Western medicine (OWM) alone-1 for diarrhea-predominant irritable bowel syndrome (IBS-D)*

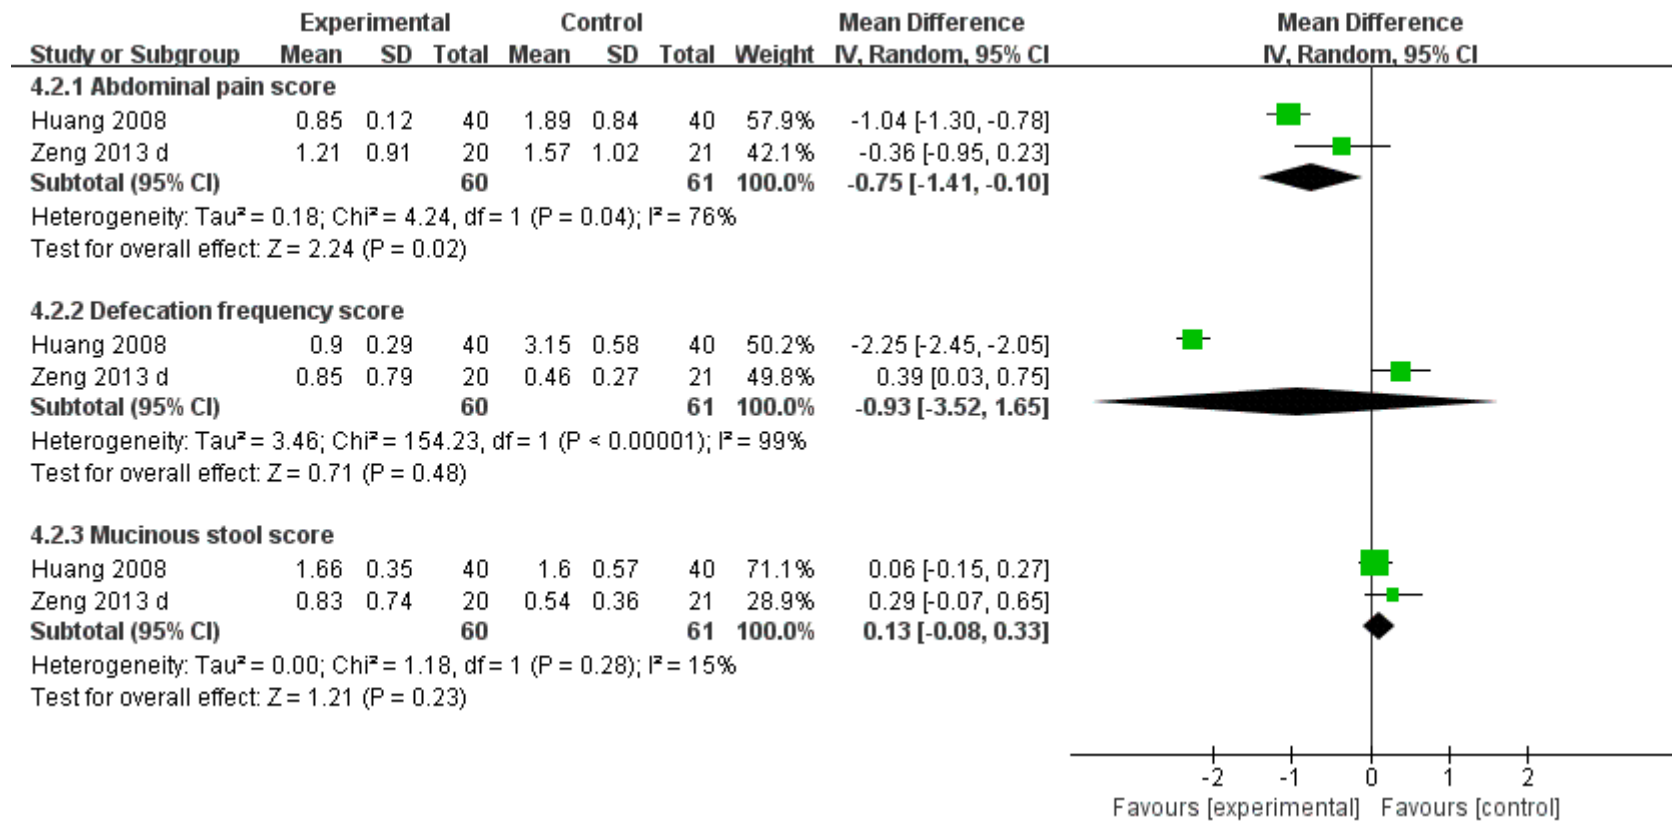

*figure S5: Acupoint catgut embedding (ACE) alone versus oral Western medicine (OWM) alone-2 for diarrhea-predominant irritable bowel syndrome (IBS-D)*

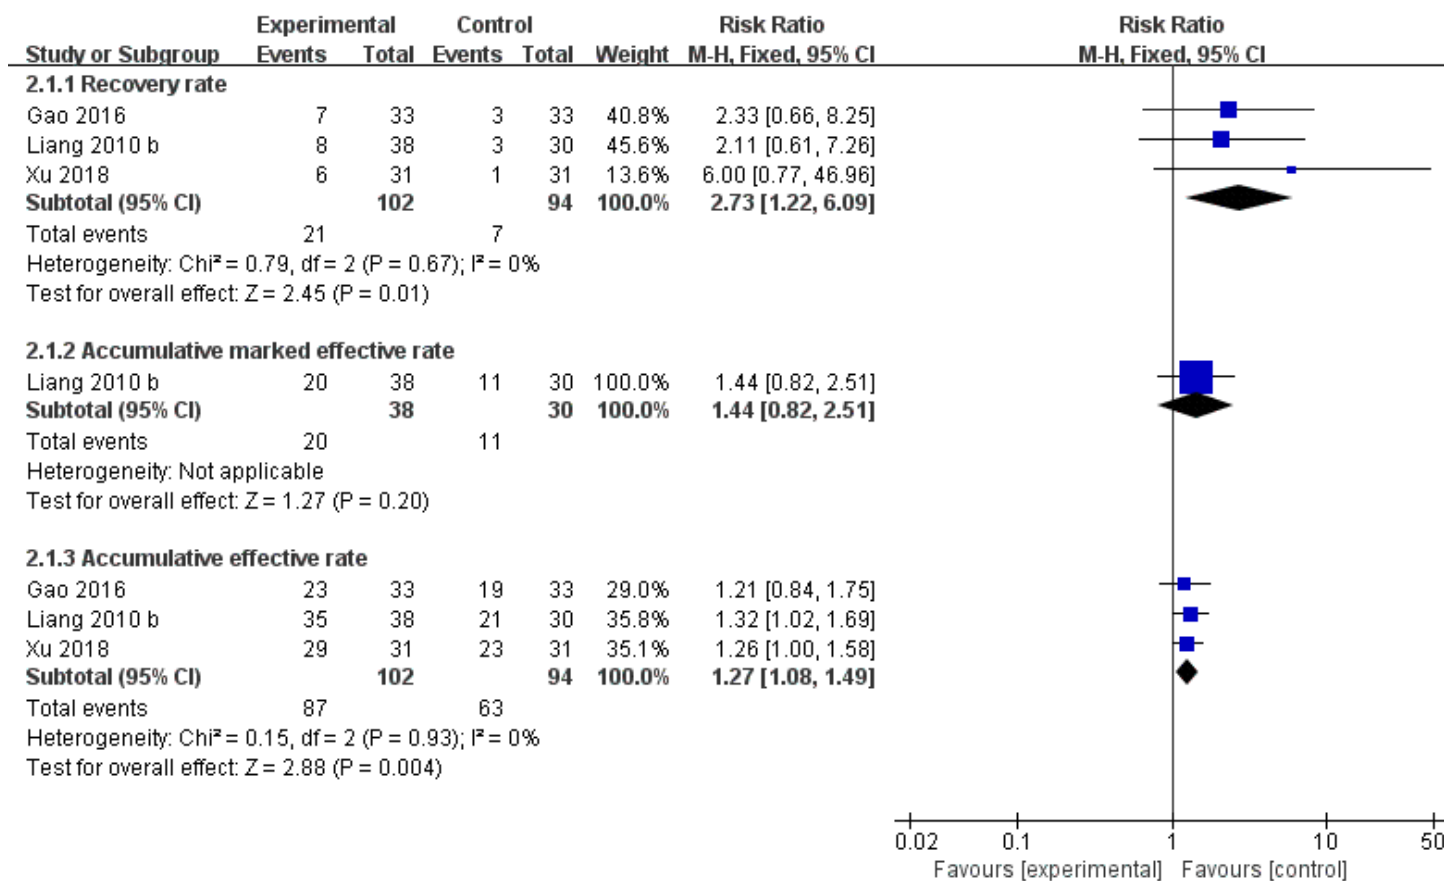

figure S6: Acupoint catgut embedding (ACE) plus other acupoint-based therapy (ABT) versus oral Western medicine (OWM) alone for constipation -predominant irritable bowel syndrome (IBS-C)

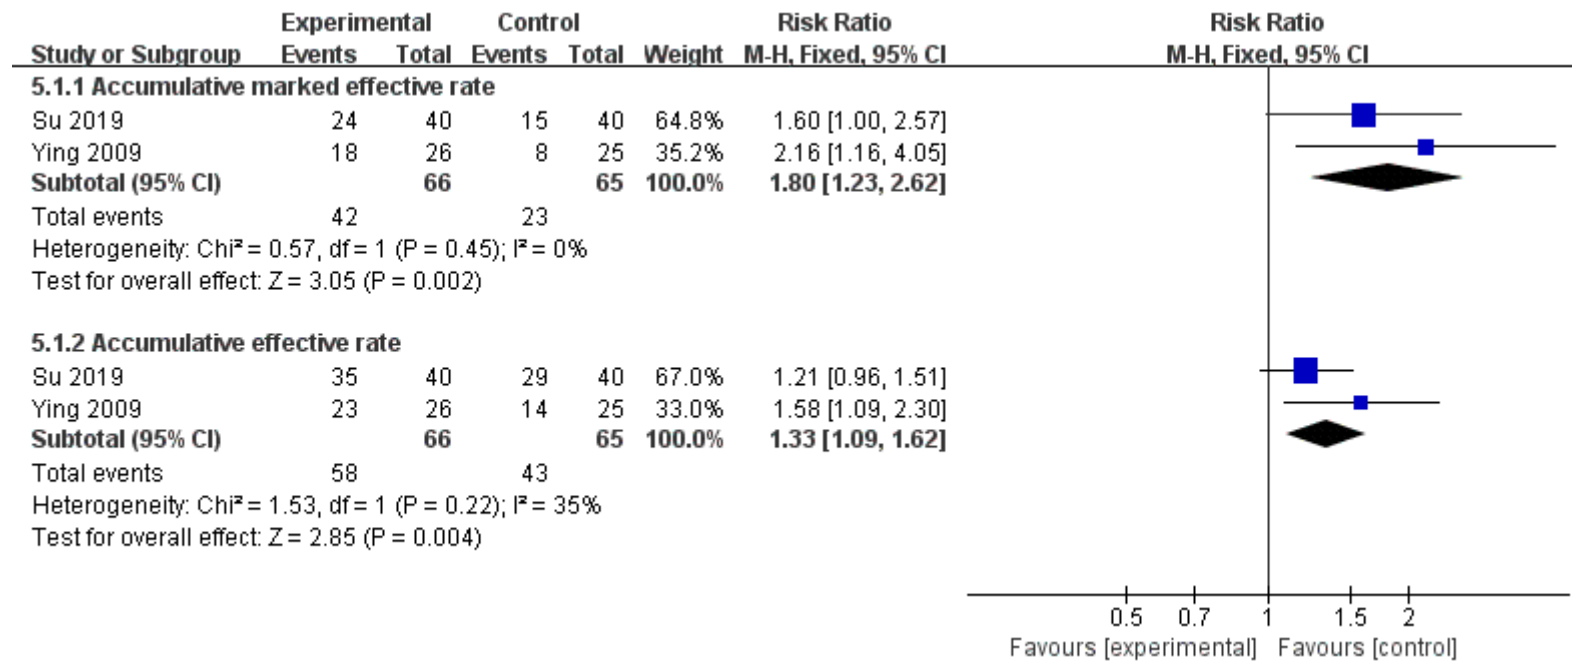

*figure S7: Acupoint catgut embedding (ACE) plus other acupoint-based therapy (ABT) versus oral Western medicine (OWM) alone for diarrhea-predominant irritable bowel syndrome (IBS-D)*



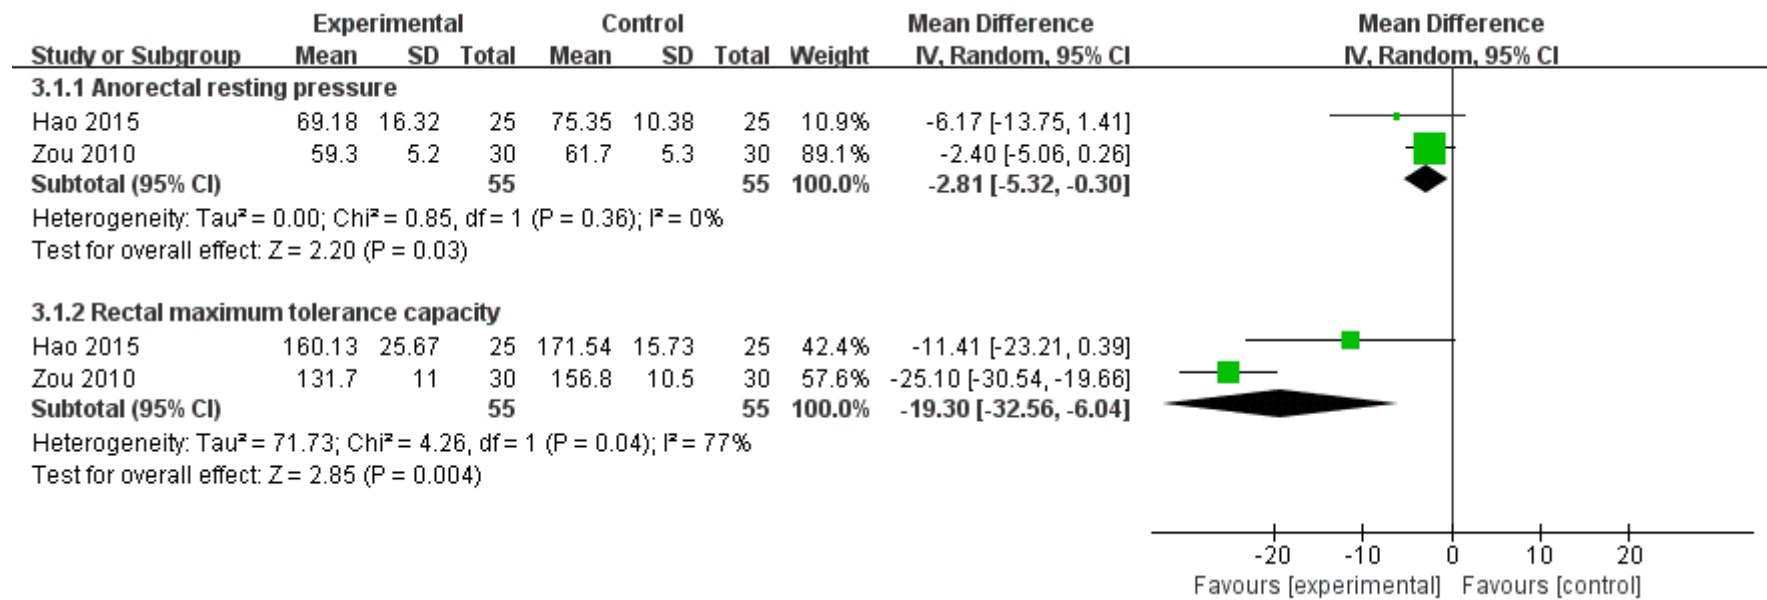

*figure S8: Acupoint catgut embedding (ACE) plus oral traditional Chinese medicine (OTCM) versus oral Western medicine (OWM) alone for constipation -predominant irritable bowel syndrome (IBS-C)*

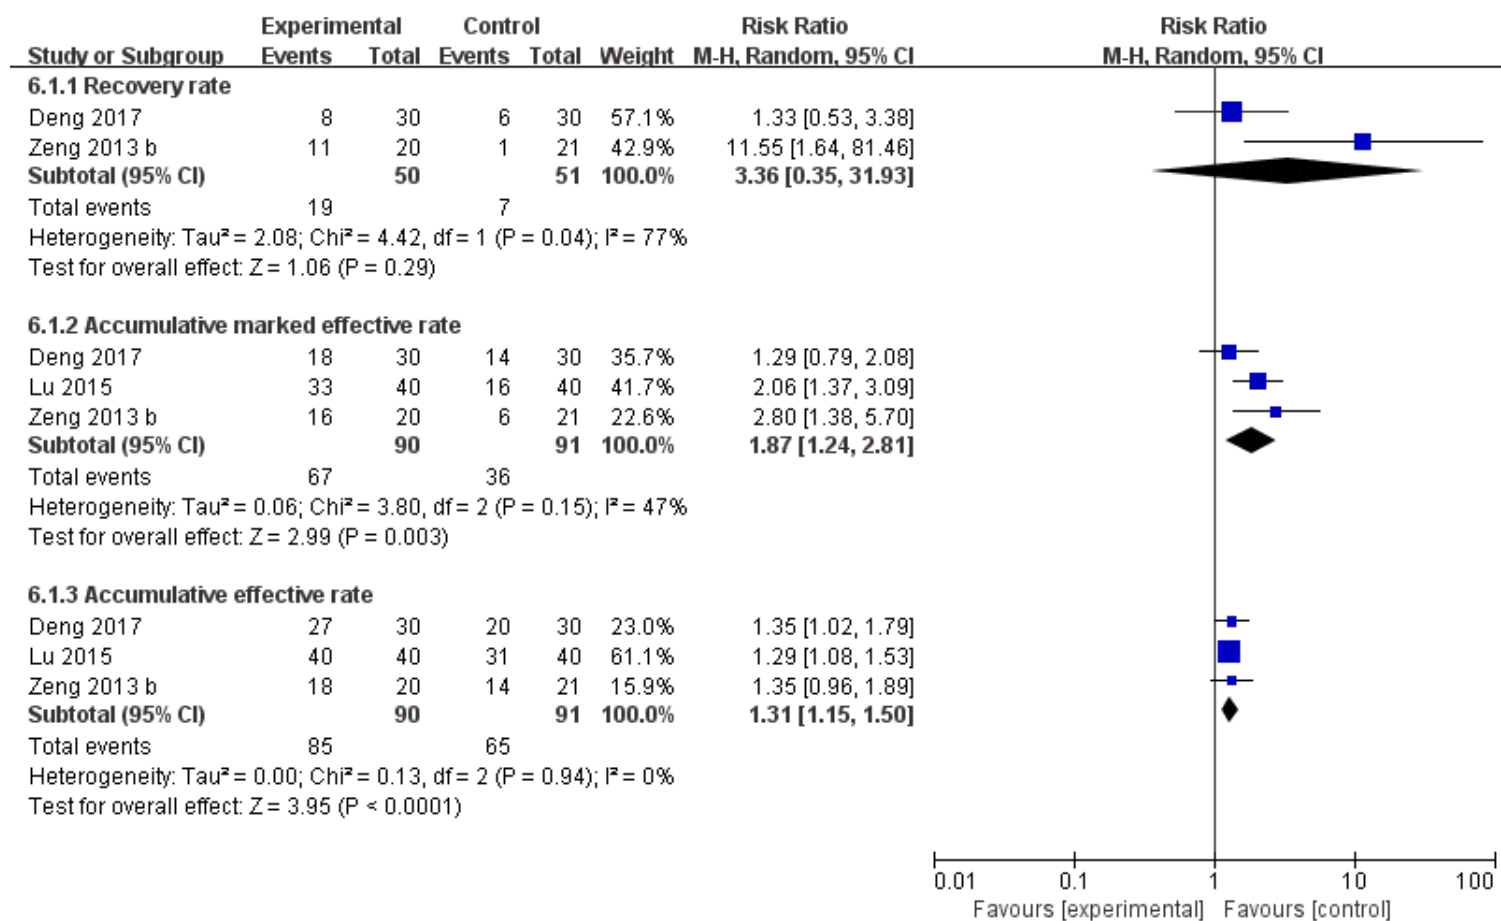

figure S9: Acupoint catgut embedding (ACE) plus oral traditional Chinese medicine (OTCM) versus oral Western medicine (OWM) alone for diarrhea-predominant irritable bowel syndrome (IBS-D)

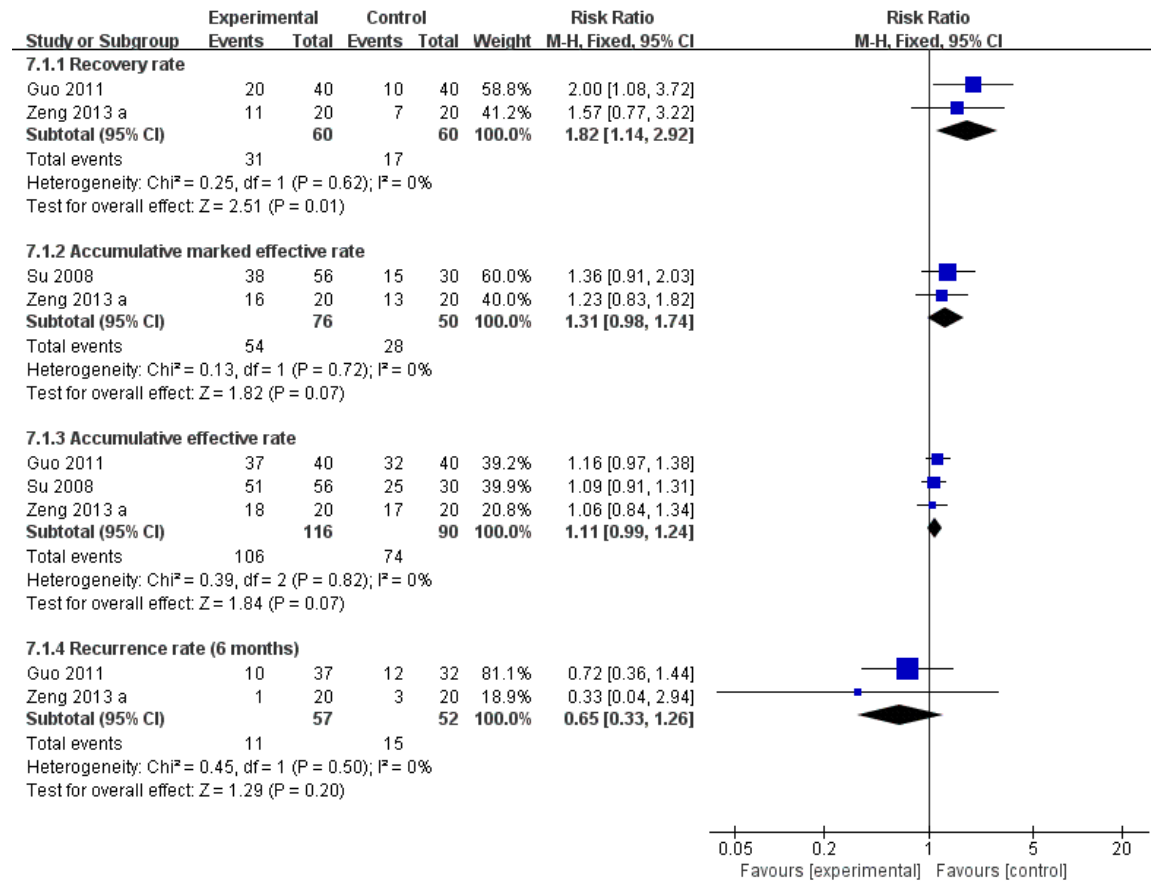

figure S10: Acupoint catgut embedding (ACE) plus oral traditional Chinese medicine (OTCM) versus OTCM alone for diarrhea-predominant irritable bowel syndrome (IBS-D)

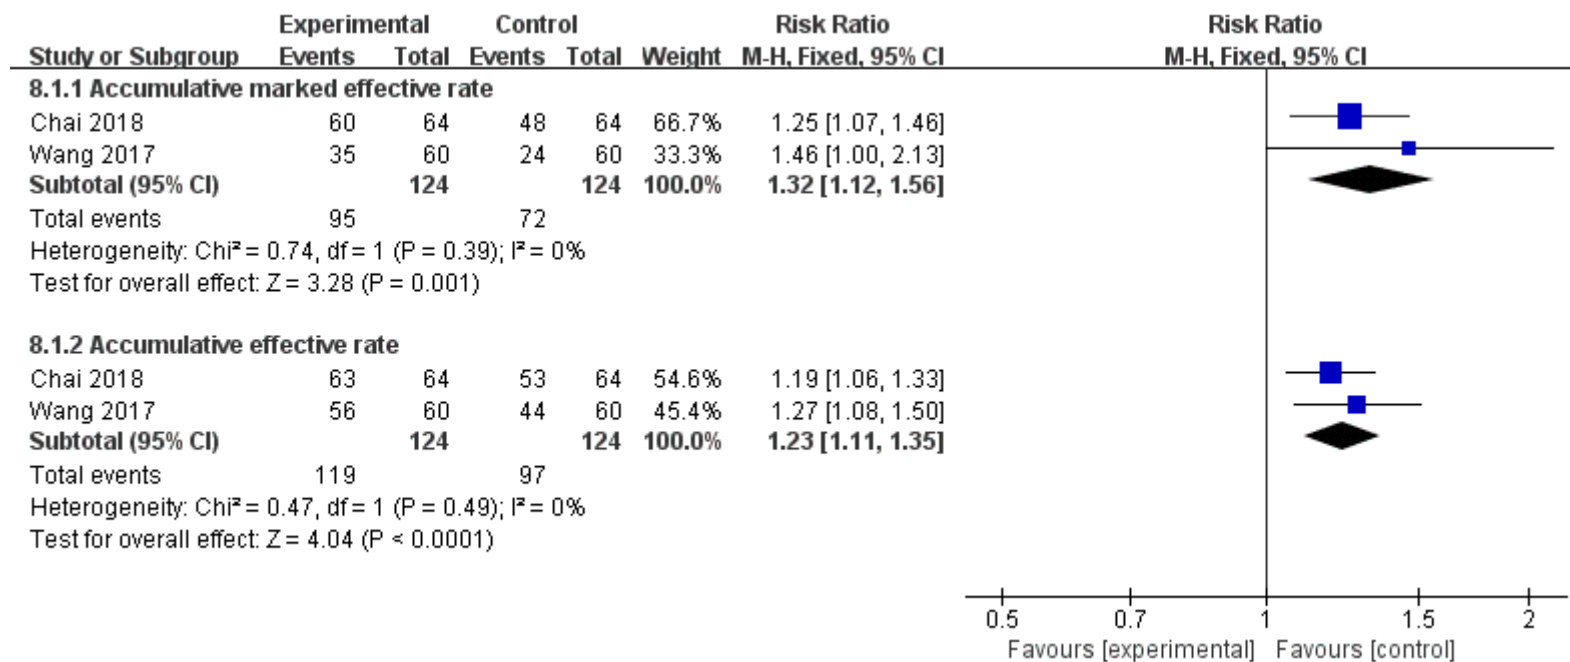

*figure S11: Acupoint catgut embedding (ACE) plus other acupoint-based therapy (ABT) versus other ABT alone for diarrhea-predominant irritable bowel syndrome (IBS-D)*

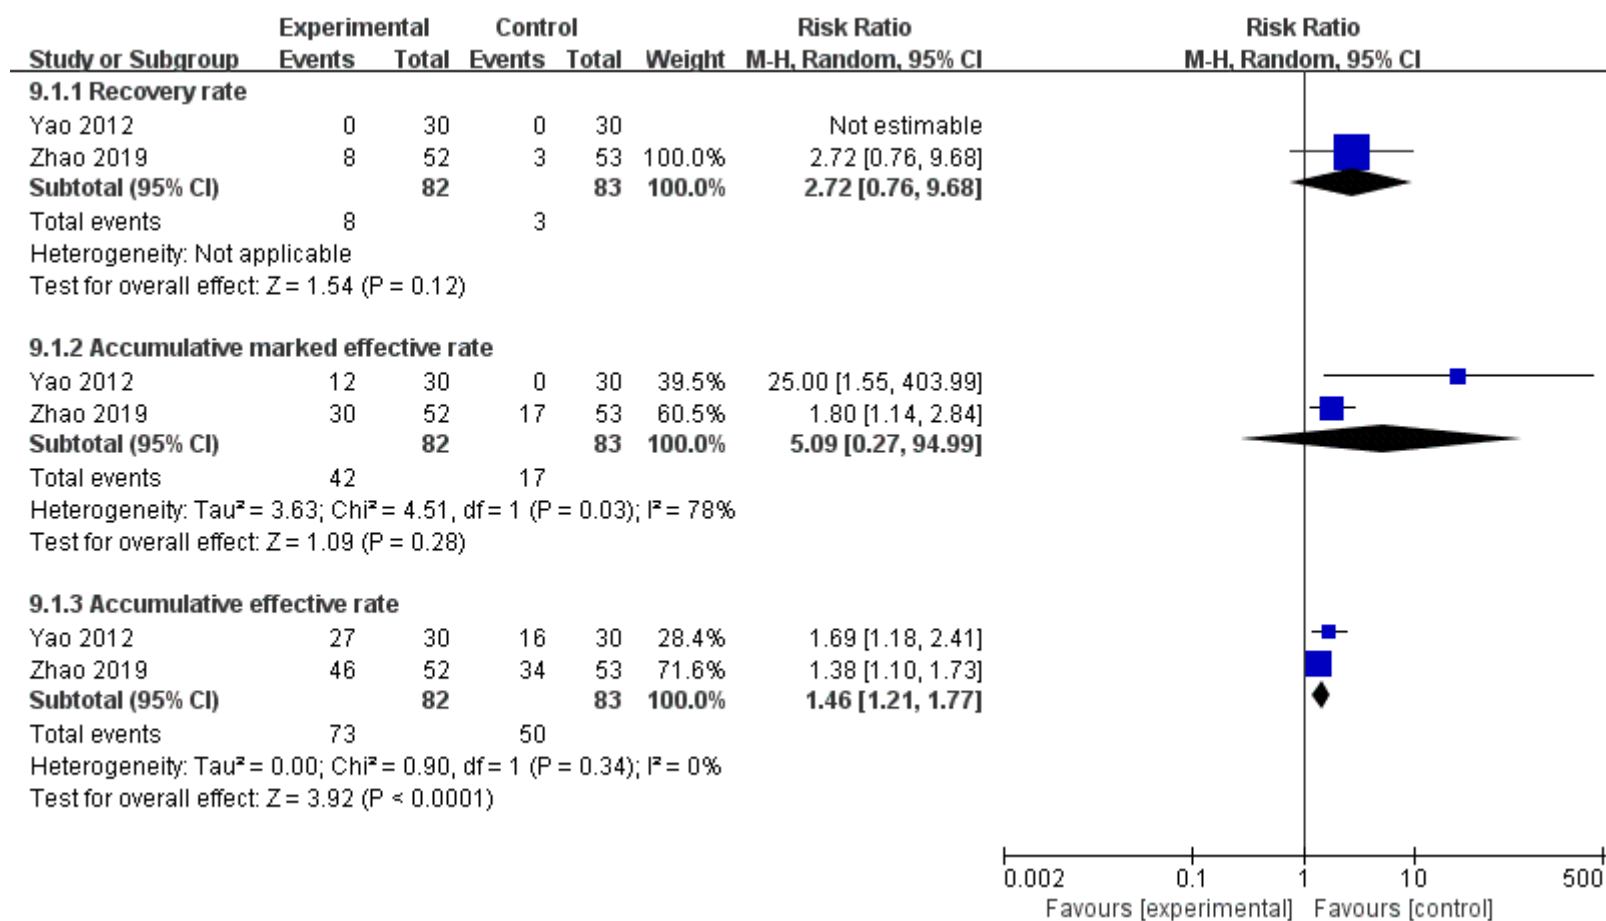

figure S12: Acupoint catgut embedding (ACE) plus oral Western medicine (OWM) versus OWM alone for diarrhea-predominant irritable bowel syndrome (IBS-D)
